# Supplementary material for: Longitudinal enumeration and cluster evaluation of circulating tumor cells improve prognostication for patients with newly diagnosed metastatic breast cancer in a prospective observational trial
Source: Springer Nature journal article supplement (doi:10.1186/s13058-018-0976-0), 2018-06-08

**Figure S1.** CTC count as a continuous variable in relation to CTC-cluster presence at baseline, 1, 3 and 6 months.

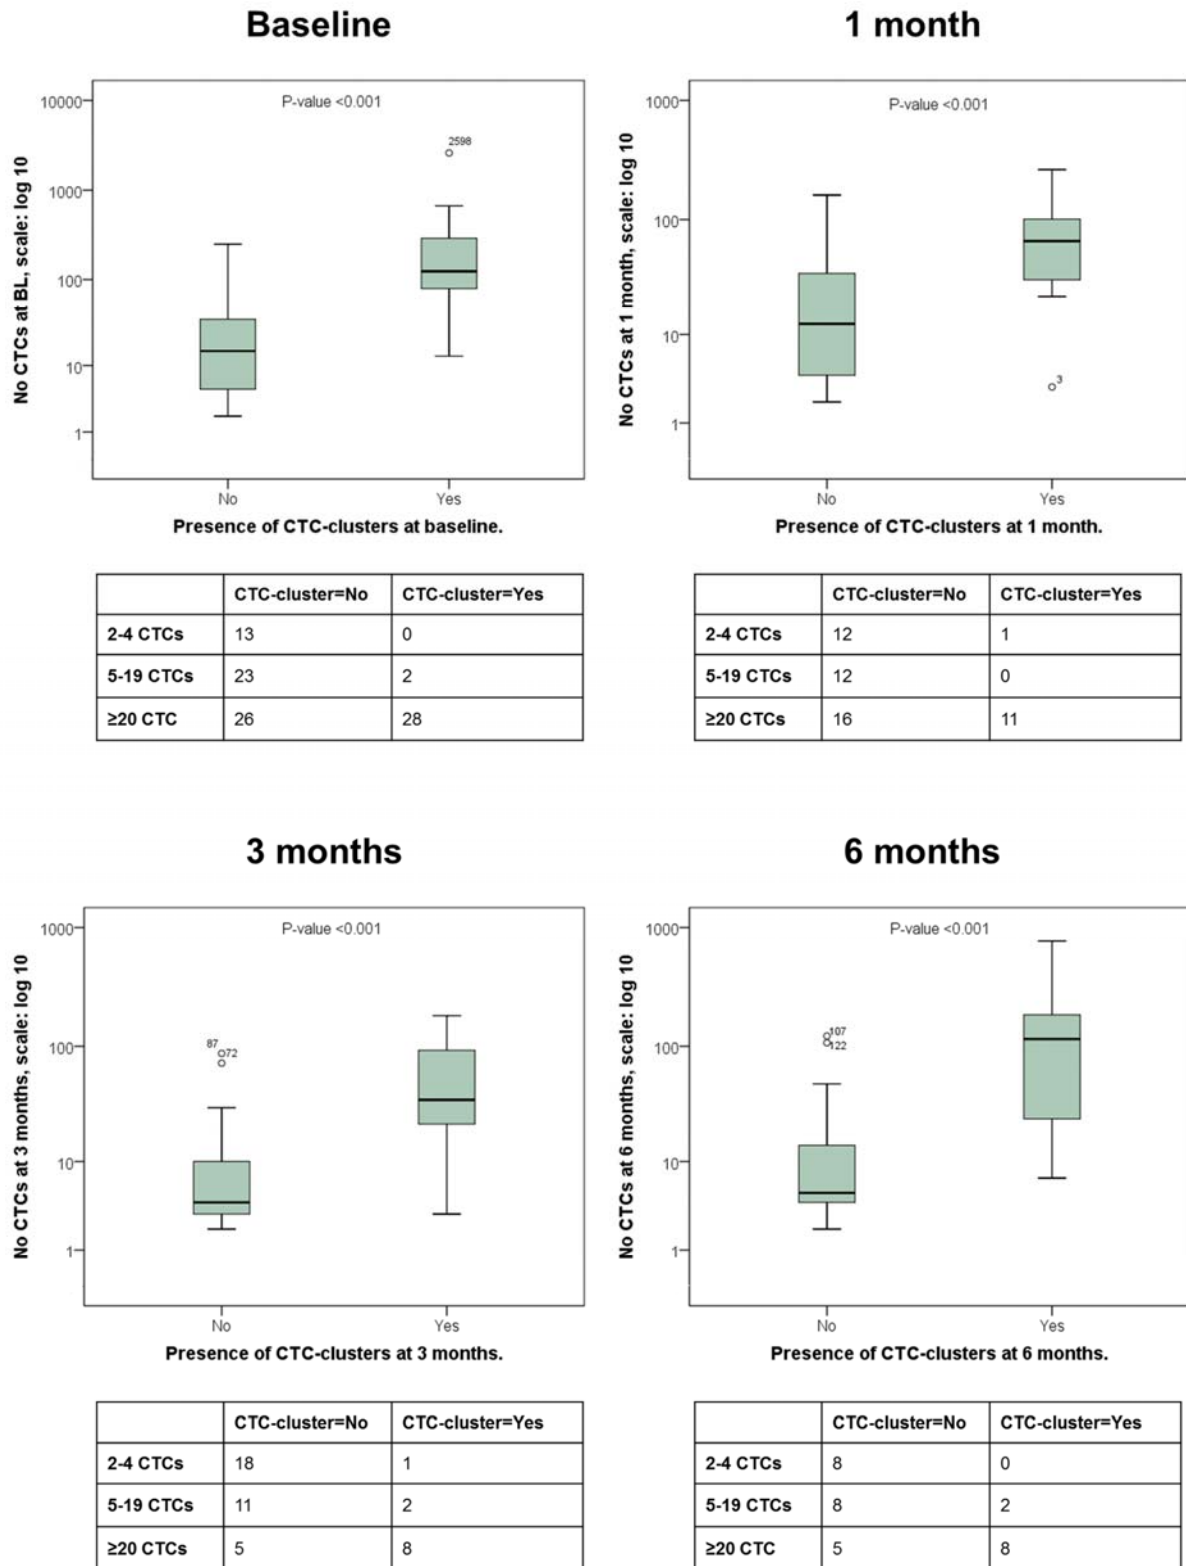

Supplement: MOESM2 [file 15831976]
