# Supplementary material for: Longitudinal enumeration and cluster evaluation of circulating tumor cells improve prognostication for patients with newly diagnosed metastatic breast cancer in a prospective observational trial
Source: Springer Nature journal article supplement (doi:10.1186/s13058-018-0976-0), 2018-06-08
Supplement: MOESM3 [file 15831976]

**Table S1.** Multivariable Cox regression analysis of prognostic variables included in the clinicopathological model

|                                         | <b>PFS</b>         |                | <b>OS</b>          |                |
|-----------------------------------------|--------------------|----------------|--------------------|----------------|
|                                         | <b>HR (95% CI)</b> | <b>P-value</b> | <b>HR (95% CI)</b> | <b>P-value</b> |
| <b>Age at diagnosis MBC<sup>a</sup></b> |                    |                |                    |                |
| <65                                     | 1.00               |                | 1.00               |                |
| ≥65                                     | 0.77 (0.49-1.23)   | 0.28           | 1.13 (0.65-1.96)   | 0.66           |
| <b>ECOG</b>                             |                    |                |                    |                |
| Ordinal scale (0, 1, 2)                 | 1.02 (0.74-1.43)   | 0.89           | 1.48 (1.01-2.18)   | 0.05           |
| <b>NHG</b>                              |                    |                |                    |                |
| I-II                                    | 1.00               |                | 1.00               |                |
| III                                     | 1.19 (0.73-1.94)   | 0.48           | 0.98 (0.53-1.81)   | 0.95           |
| <b>Subtype</b>                          |                    |                |                    |                |
| HR+HER2-                                | 1.00               |                | 1.00               |                |
| HER2+                                   | 0.74 (0.35-1.59)   | 0.44           | 0.94 (0.31-2.78)   | 0.90           |
| HR-HER2-                                | 2.48 (1.34-4.60)   | 0.004          | 4.99 (2.33-10.71)  | <0.001         |
| <b>Metastasis-free interval (years)</b> |                    |                |                    |                |
| 0                                       | 0.41 (0.13-1.26)   | 0.12           | 0.16 (0.02-1.33)   | 0.09           |
| >0-3                                    | 1.00               |                | 1.00               |                |
| >3                                      | 0.77 (0.44-1.33)   | 0.35           | 0.71 (0.38-1.36)   | 0.31           |
| <b>No. metastatic sites</b>             |                    |                |                    |                |
| <3                                      | 1.00               |                | 1.00               |                |
| ≥3                                      | 1.55 (0.92-2.63)   | 0.10           | 2.07 (1.11-3.86)   | 0.02           |
| <b>Site of metastasis</b>               |                    |                |                    |                |
| Non-visceral                            | 1.00               |                | 1.00               |                |
| Visceral                                | 1.82 (1.10-3.00)   | 0.02           | 1.65 (0.88-3.09)   | 0.12           |

<sup>a</sup>Cut off 65 years was chosen because it was the median age at diagnosis of MBC in this cohort of patients

Abbreviations: PFS, progression-free survival; OS, overall survival; HR, hazard ratio; MBC, metastatic breast cancer; ECOG, Eastern Cooperative Oncology Group; NHG, Nottingham histological grade; HR, hormone receptor; HER2, human epidermal growth factor receptor 2
