# Supplementary material for: Longitudinal enumeration and cluster evaluation of circulating tumor cells improve prognostication for patients with newly diagnosed metastatic breast cancer in a prospective observational trial
Source: Springer Nature journal article supplement (doi:10.1186/s13058-018-0976-0), 2018-06-08
Supplement: MOESM4 [file 15831976]

**Table S2.** Unadjusted Cox regression HRs for CTC count  $\geq 5$  vs  $< 5$  CTCs, and CTC count  $\geq 20$  vs  $< 20$  CTCs baseline and during 1<sup>st</sup> line systemic therapy

|                          | <b>PFS</b>        | <b>P-value</b> | <b>OS</b>          | <b>P-value</b> |
|--------------------------|-------------------|----------------|--------------------|----------------|
| <b>Baseline</b>          |                   |                |                    |                |
| $\geq 5$ vs $< 5$ CTCs   | 1.75 (1.19-2.57)  | 0.004          | 2.55 (1.54-4.22)   | $< 0.001$      |
| $\geq 20$ vs $< 20$ CTCs | 2.17 (1.49-3.16)  | $< 0.001$      | 3.35 (2.10-5.33)   | $< 0.001$      |
| <b>1 month</b>           |                   |                |                    |                |
| $\geq 5$ vs $< 5$ CTCs   | 2.11 (1.38-3.24)  | 0.001          | 4.24 (2.49-7.20)   | $< 0.001$      |
| $\geq 20$ vs $< 20$ CTCs | 3.23 (2.04-5.10)  | $< 0.001$      | 6.20 (3.61-10.67)  | $< 0.001$      |
| <b>3 months</b>          |                   |                |                    |                |
| $\geq 5$ vs $< 5$ CTCs   | 2.08 (1.11-3.93)  | 0.02           | 3.10 (1.61-6.00)   | 0.001          |
| $\geq 20$ vs $< 20$ CTCs | 8.66 (3.77-19.91) | $< 0.001$      | 6.67 (3.24-13.74)  | $< 0.001$      |
| <b>6 months</b>          |                   |                |                    |                |
| $\geq 5$ vs $< 5$ CTCs   | 4.07 (1.94-8.51)  | $< 0.001$      | 8.58 (3.70-19.9)   | $< 0.001$      |
| $\geq 20$ vs $< 20$ CTCs | 9.05 (3.35-24.42) | $< 0.001$      | 17.53 (7.07-43.48) | $< 0.001$      |
