# Supplementary material for: Longitudinal enumeration and cluster evaluation of circulating tumor cells improve prognostication for patients with newly diagnosed metastatic breast cancer in a prospective observational trial
Source: Springer Nature journal article supplement (doi:10.1186/s13058-018-0976-0), 2018-06-08
Supplement: MOESM5 [file 15831976]

**Table S3.** Change in CTC count from baseline to 1 month, and from BL to 3 months, in relation to progression vs non-progression at 1<sup>st</sup> radiologic evaluation performed at 3 months

|                                   | No of patients | Non-PD | PD | OR (95% CI)         | P-value |
|-----------------------------------|----------------|--------|----|---------------------|---------|
| <b>Baseline CTC, 1 months CTC</b> |                |        |    |                     |         |
| <5 CTC, <5 CTC                    | 65             | 57     | 8  | 1.00                |         |
| ≥5 CTC, <5 CTC                    | 33             | 28     | 5  | 1.27 (0.38-4.25)    | 0.70    |
| <5 CTC, ≥5 CTC                    | 0              |        |    |                     |         |
| ≥5 CTC, ≥5 CTC                    | 35             | 22     | 13 | 4.21 (1.54-11.55)   | 0.005   |
| <b>Baseline CTC, 3 months CTC</b> |                |        |    |                     |         |
| <5 CTC, <5 CTC                    | 61             | 57     | 4  | 1.00                |         |
| ≥5 CTC, <5 CTC                    | 45             | 36     | 9  | 3.56 (1.02-12.43)   | 0.05    |
| <5 CTC, ≥5 CTC                    | 2              | 1      | 1  | 14.25 (0.75-272.64) | 0.08    |
| ≥5 CTC, ≥5 CTC                    | 23             | 14     | 9  | 9.16 (2.46-34.12)   | 0.001   |

Abbreviations: PD, progressive disease; CI, confidence interval; CTC, circulating tumor cell
