# Supplementary material for: Longitudinal enumeration and cluster evaluation of circulating tumor cells improve prognostication for patients with newly diagnosed metastatic breast cancer in a prospective observational trial
Source: Springer Nature journal article supplement (doi:10.1186/s13058-018-0976-0), 2018-06-08
Supplement: MOESM6 [file 15831976]

**Table S4.** Unadjusted Cox regression analyses of patient and tumor characteristics at baseline

|                                                  | <b>PFS</b>       |                 | <b>OS</b>        |                 |
|--------------------------------------------------|------------------|-----------------|------------------|-----------------|
|                                                  | HR (95% CI)      | <i>P</i> -value | HR (95% CI)      | <i>P</i> -value |
| <b>Age at diagnosis<br/>MBC (years)</b>          |                  |                 |                  |                 |
| <65                                              | 1.00             |                 | 1.00             |                 |
| ≥65                                              | 0.82 (0.57-1.17) | 0.27            | 1.12 (0.73-1.73) | 0.60            |
| <b>ECOG</b>                                      |                  |                 |                  |                 |
| 0                                                | 1.00             |                 | 1.00             |                 |
| 1                                                | 1.27 (0.83-1.95) | 0.27            | 1.68 (0.99-2.85) | 0.05            |
| 2                                                | 1.34 (0.79-2.28) | 0.28            | 2.67 (1.49-4.78) | 0.001           |
| <b>NHG</b>                                       |                  |                 |                  |                 |
| I-II                                             | 1.00             |                 | 1.00             |                 |
| III                                              | 1.37 (0.90-2.07) | 0.14            | 1.37 (0.83-2.25) | 0.22            |
| <b>PT Tumor size (mm)</b>                        |                  |                 |                  |                 |
| ≤20 (T1)                                         | 1.00             |                 | 1.00             |                 |
| >20 (T2-4)                                       | 0.93 (0.63-1.36) | 0.70            | 1.07 (0.68-1.70) | 0.76            |
| <b>PT Node status</b>                            |                  |                 |                  |                 |
| Negative                                         | 1.00             |                 | 1.00             |                 |
| Positive                                         | 1.02 (0.63-1.65) | 0.94            | 0.98 (0.65-1.48) | 0.94            |
| <b>Subtype</b>                                   |                  |                 |                  |                 |
| HR+HER2-                                         | 1.00             |                 | 1.00             |                 |
| HER2+                                            | 0.76 (0.43-1.32) | 0.33            | 0.72 (0.34-1.52) | 0.39            |
| HR-HER2-                                         | 2.58 (1.58-4.20) | <0.001          | 5.42 (3.08-9.55) | <0.001          |
| <b>Metastasis-free<br/>interval (years)</b>      |                  |                 |                  |                 |
| 0                                                | 0.51 (0.29-0.92) | 0.02            | 0.27 (0.14-0.55) | <0.001          |
| >0-3                                             | 1.00             |                 | 1.00             |                 |
| >3                                               | 0.65 (0.40-1.04) | 0.07            | 0.46 (0.27-0.77) | 0.003           |
| <b>No metastatic sites</b>                       |                  |                 |                  |                 |
| <3                                               | 1.00             |                 | 1.00             |                 |
| ≥3                                               | 2.07 (1.41-3.03) | <0.001          | 2.18 (1.41-3.37) | <0.001          |
| <b>Site of metastasis</b>                        |                  |                 |                  |                 |
| Non-visceral                                     | 1.00             |                 | 1.00             |                 |
| Visceral                                         | 1.69 (1.16-2.45) | 0.006           | 1.59 (1.02-2.48) | 0.04            |
| <b>Baseline CA15-3<br/>(kE/L)</b>                |                  |                 |                  |                 |
| <30                                              | 1.00             |                 | 1.00             |                 |
| ≥30                                              | 1.40 (0.86-2.29) | 0.17            | 1.56 (0.86-2.85) | 0.15            |
| <b>1<sup>st</sup> line treatment for<br/>MBC</b> |                  |                 |                  |                 |

|               |                  |      |                  |       |
|---------------|------------------|------|------------------|-------|
| Endocrine     | 1.00             |      | 1.00             |       |
| Chemotherapy  | 1.65 (1.10-2.47) | 0.02 | 2.07 (1.25-3.42) | 0.005 |
| HER2-targeted | 0.82 (0.42-1.61) | 0.56 | 0.91 (0.37-2.23) | 0.83  |

Abbreviations: PFS, progression-free survival; OS, overall survival; HR, hazard ratio; MBC, metastatic breast cancer; NHG, Nottingham histological grade; PT, primary tumor; HR, hormone receptor; HER2, human epidermal growth factor receptor 2
